# Supplementary material
Source: PubMed Central journal article supplement (PMC1630440)

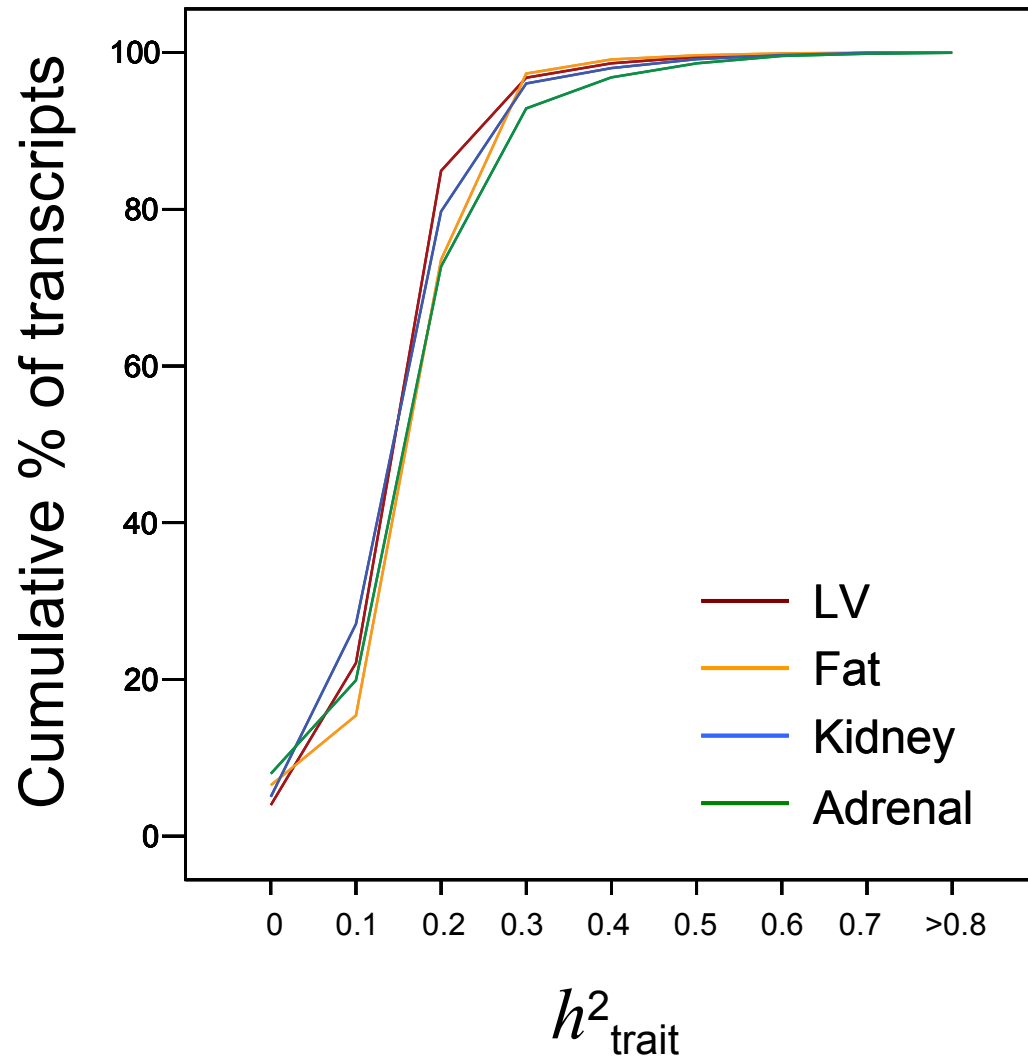

Supplement: pgen.0020172.sg002.pdf [file pgen.0020172.sg002.pdf]
